# Supplementary material for: Absorbed hydrogen enhances the catalytic hydrogenation activity of Rh-based nanocatalysts
Source: Royal Society of Chemistry journal article supplement (doi:10.1039/c8cy00522b), 2018-01-01

## Supplementary Information

# Absorbed hydrogen enhances the catalytic hydrogenation activity of Rh-based nanocatalysts

*Franck Morfin<sup>1</sup>, Lucie Blondeau<sup>2</sup>, Karine Provost<sup>2</sup>, Abdelmalek Malouche<sup>2</sup>, Laurent Piccolo<sup>1\*</sup>  
and Claudia Zlotea<sup>2\*</sup>*

<sup>1</sup> *Univ Lyon, Université Claude Bernard - Lyon 1, CNRS, IRCELYON - UMR 5256, 2 Avenue  
Albert Einstein, F-69626 VILLEURBANNE CEDEX, France*

<sup>2</sup> *Université Paris Est, Institut de Chimie et des Matériaux Paris-Est (UMR 7182), CNRS, UPEC,  
2-8 rue Henri Dunant, F-94320 Thiais, France*

Figure S1. XRD patterns of carbon support (HSAG) and RhH<sub>x</sub>@HSAG.

Figure S2. Conversion of butadiene and selectivity into butenes on Rh and RhH<sub>x</sub> catalysts as a function of time on stream at 22°C for various gas feeds.

Figure S3. Ratio of the conversions of butadiene on Rh and RhH<sub>x</sub> catalysts as a function of time on stream at 22°C for various gas feeds. In order to reflect reliable activity amplifications, the data points corresponding to more than 75% conversion of butadiene for Rh and/or RhH<sub>x</sub> are not plotted.

Figure S4. Conversion and the selectivity into butenes as a function of temperature for Rh and RhH<sub>x</sub> catalysts in a feed mixture C<sub>4</sub>H<sub>6</sub>:H<sub>2</sub> = 2:10%.

Figure S5. (a) Relationship between selectivity into butenes and butadiene conversion for Rh and RhH<sub>x</sub> catalysts various reactant mixtures. (b) Zoom on the low-conversion area. It should be noted that the *cis*-2-butene impurity present in the gas feed with butadiene (0.3% of the total hydrocarbon amount) has been subtracted for the calculation of this distribution.

Figure S6. Distribution of the isomers of butene as function of conversion for the hydrogenation of 1,3 butadiene on Rh and RhH<sub>x</sub> catalysts for two gas feed compositions.

Figure S7. XAS spectra of Rh nanoparticles under H<sub>2</sub> and reaction quasi-stationary conditions in hydride and metallic states. The XANES region is also shown in the inset. For comparison, the spectrum of bulk Rh is also plotted.

Figure S8. EXAFS spectra and corresponding FT of metal Rh nanoparticles during the hydrogenation of butadiene under 0.5% C<sub>4</sub>H<sub>6</sub> and 2.5% H<sub>2</sub> in He (36 ml min<sup>-1</sup>).

Figure S9. EXAFS spectra and corresponding FT of hydride RhH<sub>x</sub> nanoparticles during the hydrogenation of butadiene under 0.5% C<sub>4</sub>H<sub>6</sub> and 2.5% H<sub>2</sub> in He (36 ml min<sup>-1</sup>).

Figure S10. *Operando* EXAFS-MS experiment for hydrogenation of butadiene (C<sub>4</sub>H<sub>6</sub>:H<sub>2</sub> = 0.5:2.5% in He, 1 atm, 36 ml/min, RT) on C-supported Rh and RhH<sub>x</sub> catalysts. Hydrocarbon contents derived from smoothed MS intensities with *m/z* = 39, 41, and 43, accounting for (i) the relative fragment peak intensities for the pure compounds (1,3-butadiene, 1-butene and butane) and (ii) the total fragment distribution.

Figure S1. XRD patterns of carbon support (HSAG) and RhH<sub>x</sub>@HSAG.

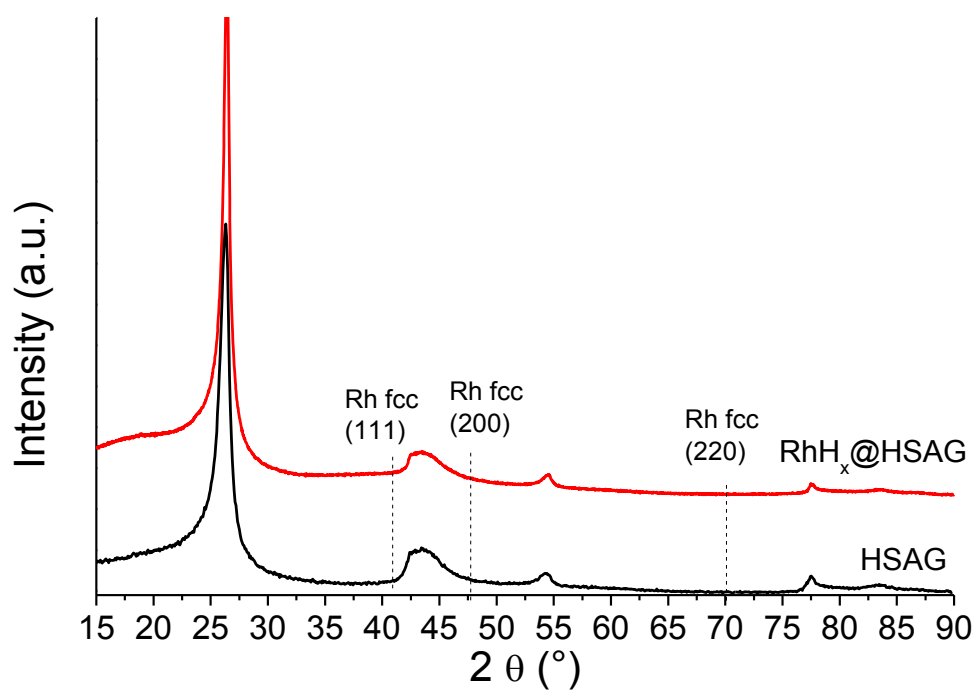

Figure S2. Conversion of butadiene and selectivity into butenes on Rh and RhH<sub>x</sub> catalysts as a function of time on stream at 22°C for various gas feeds.

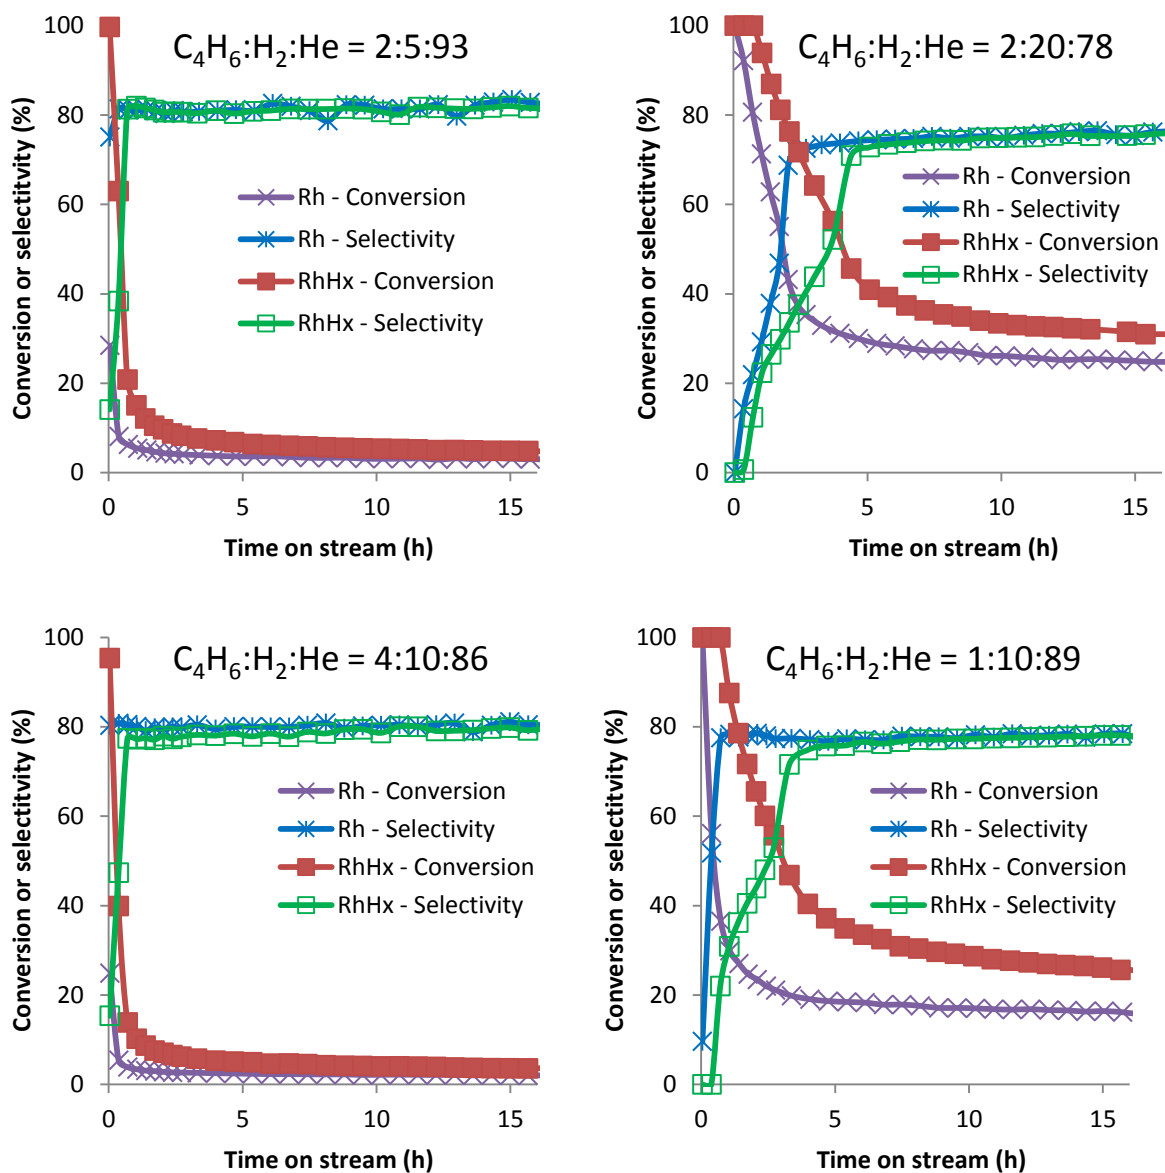

Figure S3. Ratio of the conversions of butadiene on Rh and RhH<sub>x</sub> catalysts as a function of time on stream at 22°C for various gas feeds. In order to reflect reliable activity amplifications, the data points corresponding to more than 75% conversion of butadiene for Rh and/or RhH<sub>x</sub> are not plotted.

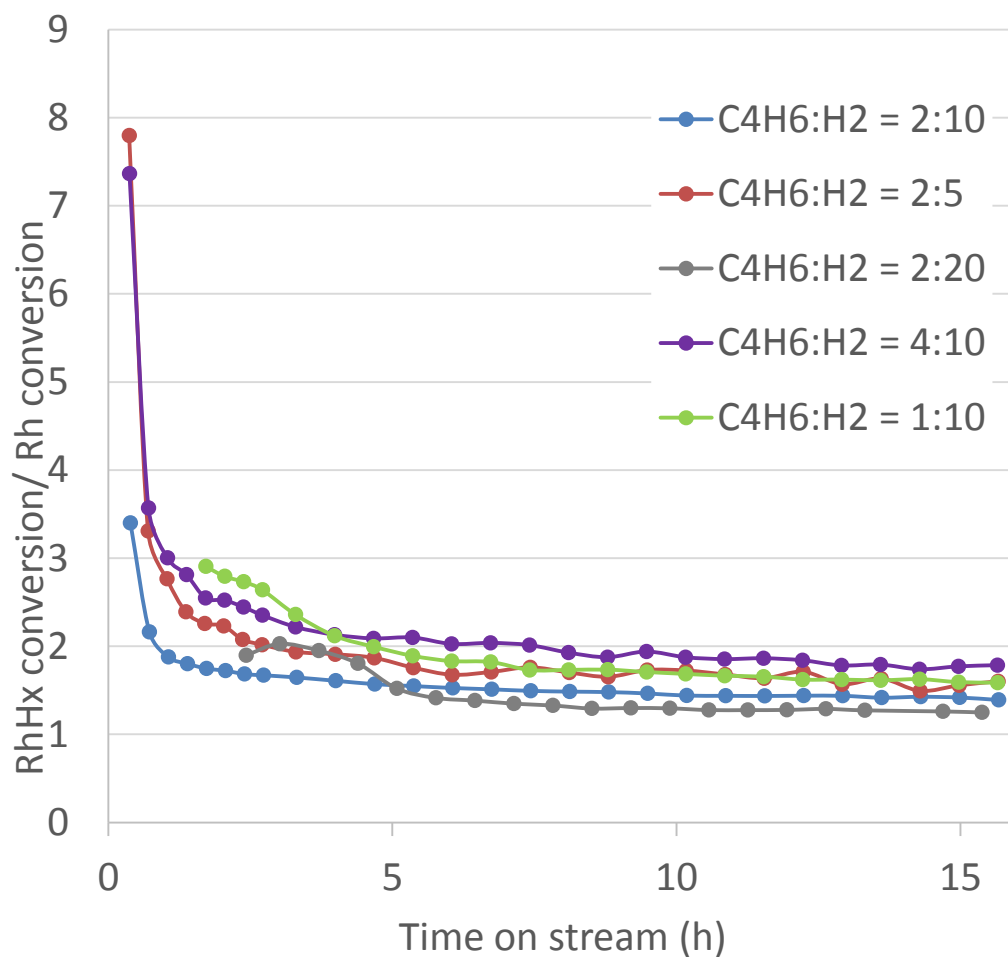

Figure S4. Conversion and the selectivity into butenes as a function of temperature for Rh and RhH<sub>x</sub> catalysts in a feed mixture C<sub>4</sub>H<sub>6</sub>:H<sub>2</sub> = 2:10%.

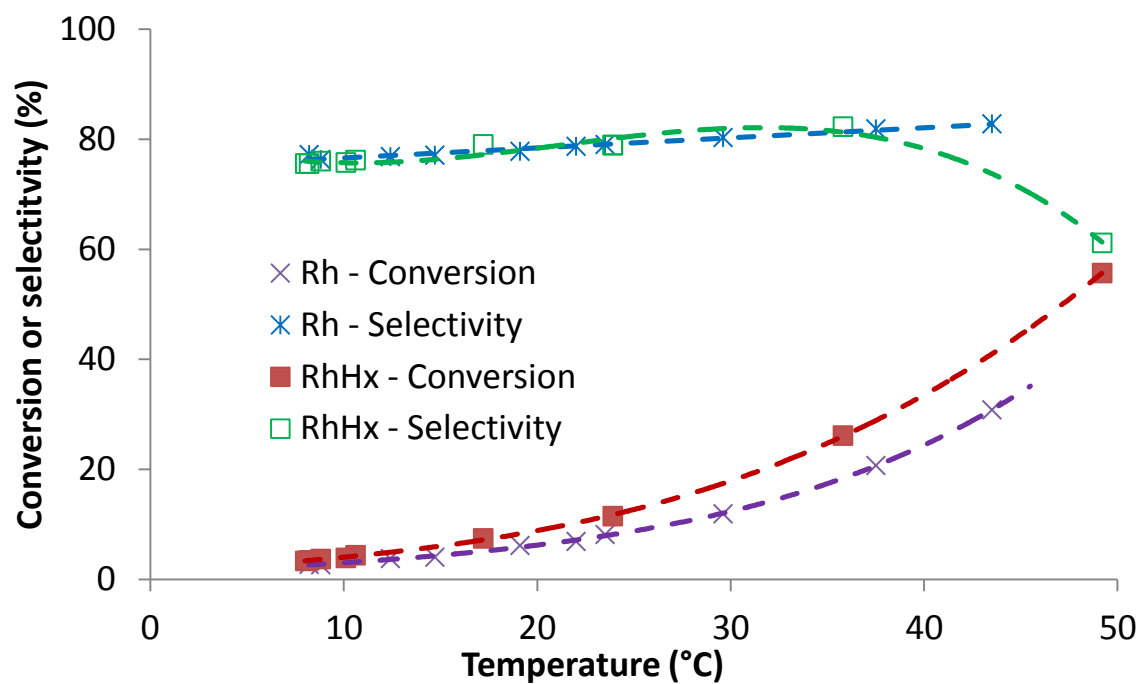

Figure S5. (a) Relationship between selectivity into butenes and butadiene conversion for Rh and RhH<sub>x</sub> catalysts various reactant mixtures. (b) Zoom on the low-conversion area. It should be noted that the *cis*-2-butene impurity present in the gas feed with butadiene (0.3% of the total hydrocarbon amount) has been subtracted for the calculation of this distribution.

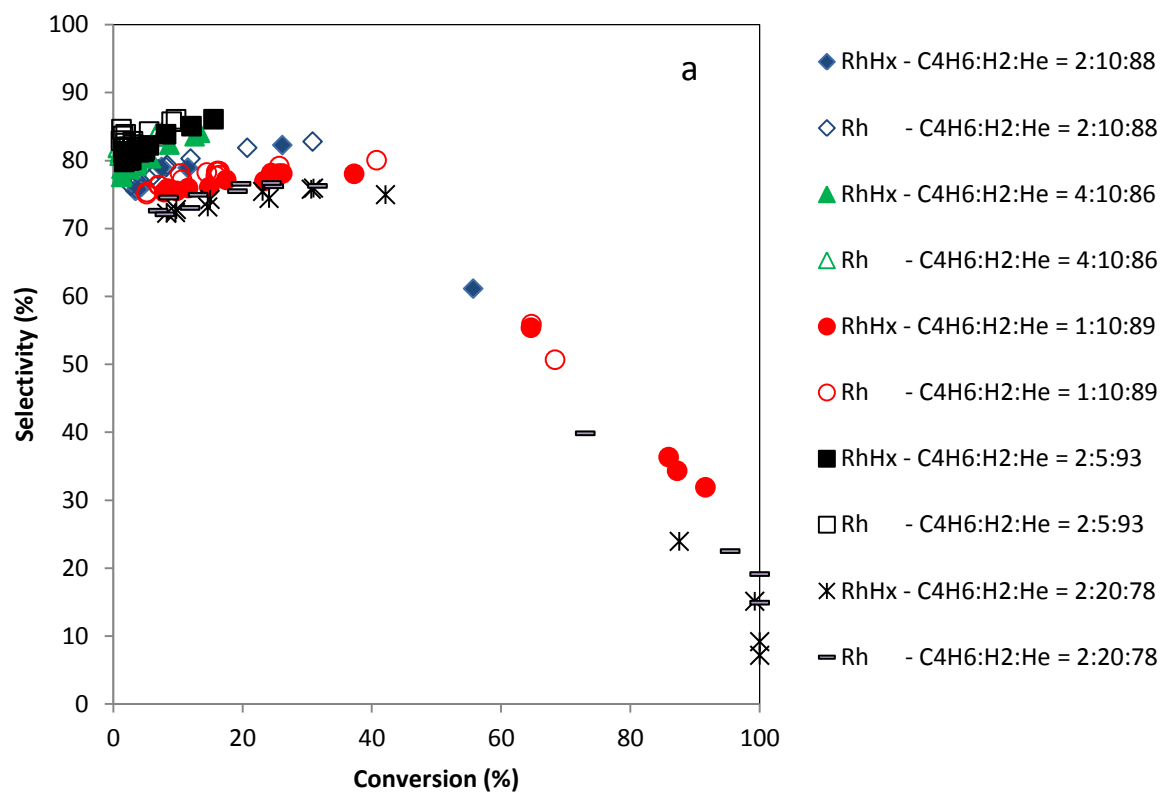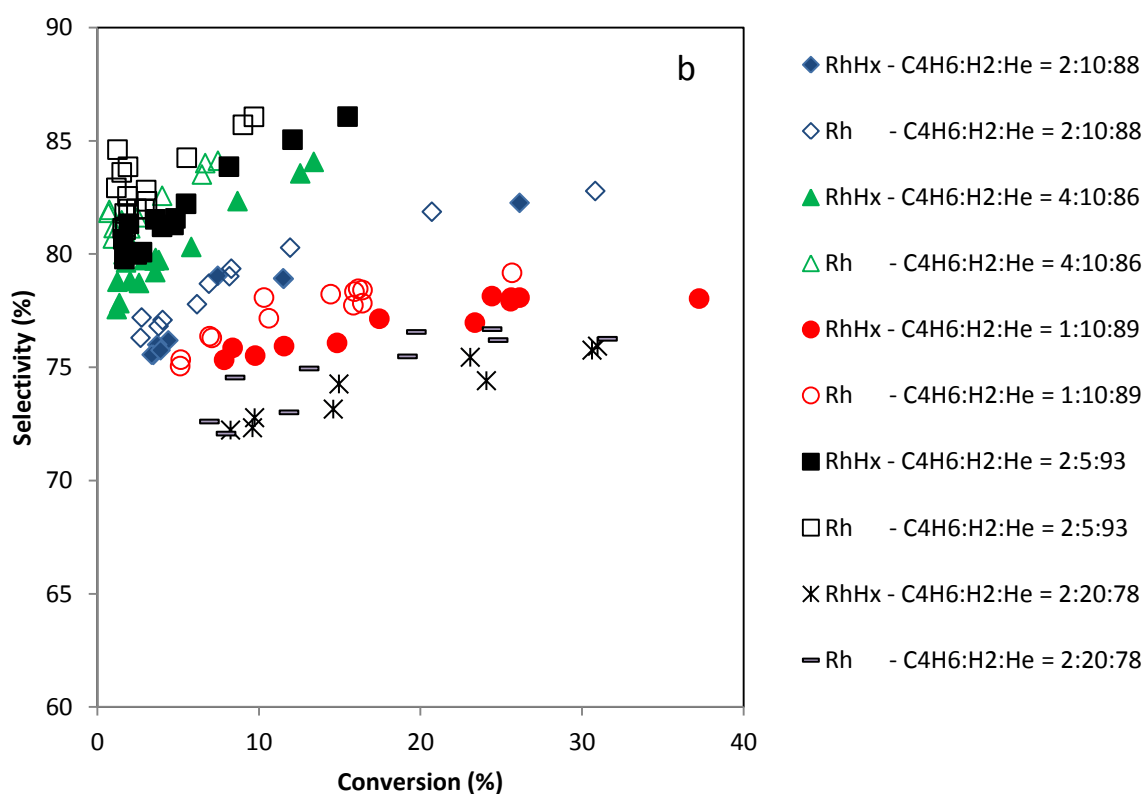

Figure S6. Distribution of the isomers of butene as function of conversion for the hydrogenation of 1,3 butadiene on Rh and RhH<sub>x</sub> catalysts for two gas feed compositions.

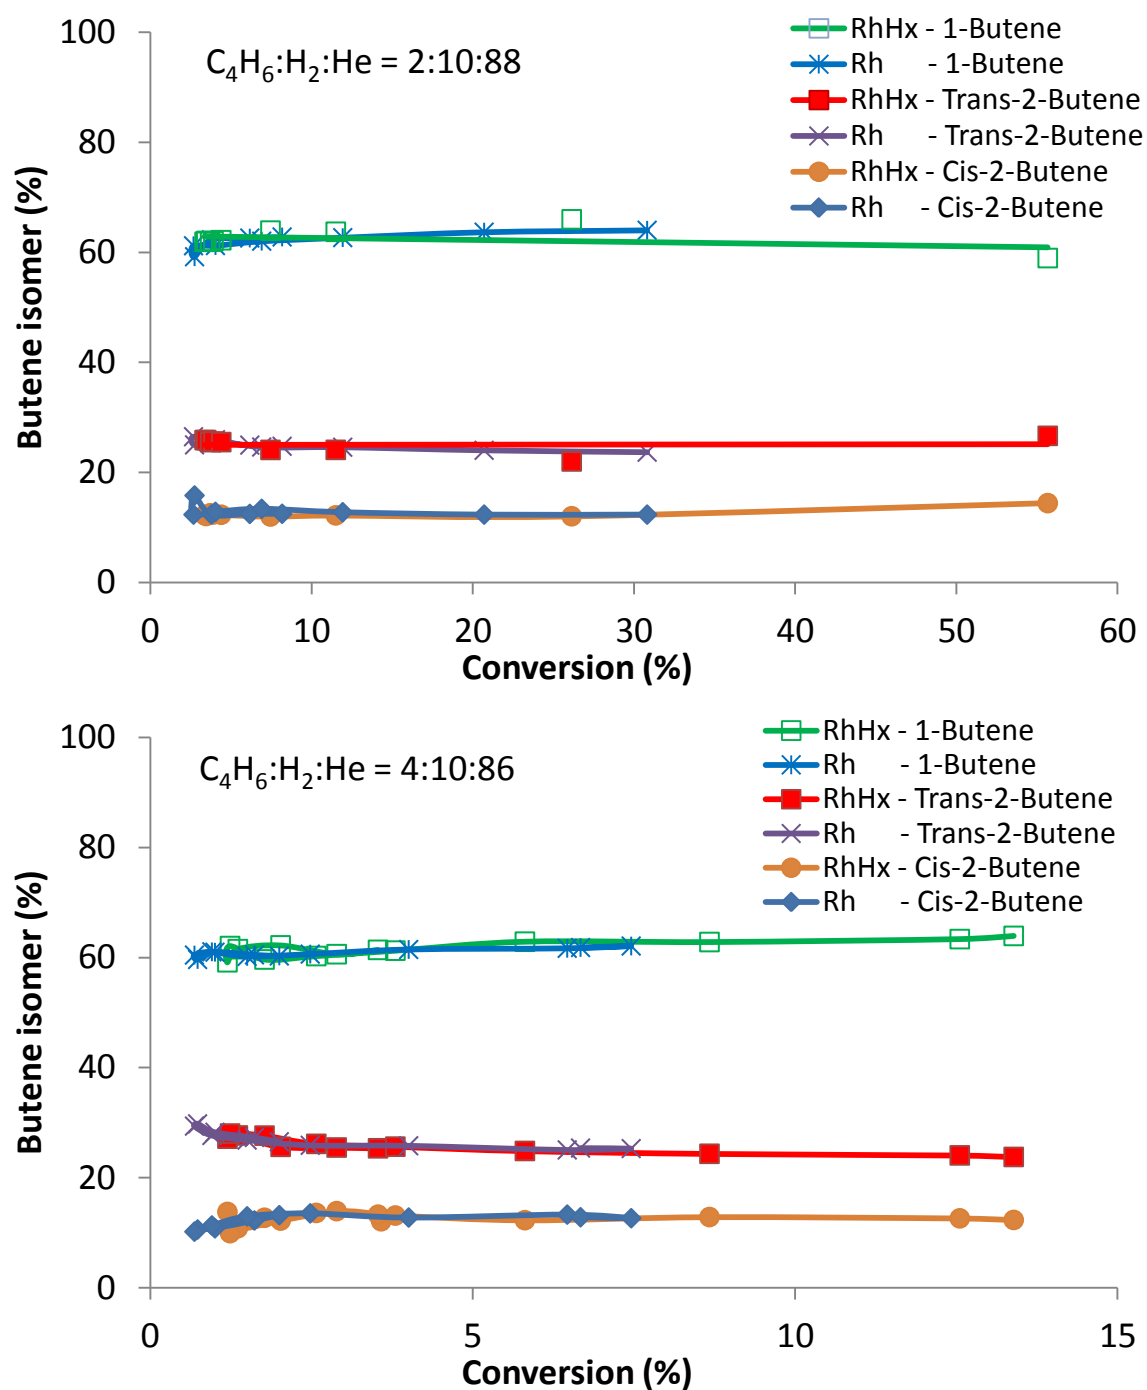



Figure S7. XAS spectra of Rh nanoparticles under  $H_2$  and reaction quasi-stationary conditions in hydride and metallic states. The XANES region is also shown in the inset. For comparison, the spectrum of bulk Rh is also plotted.

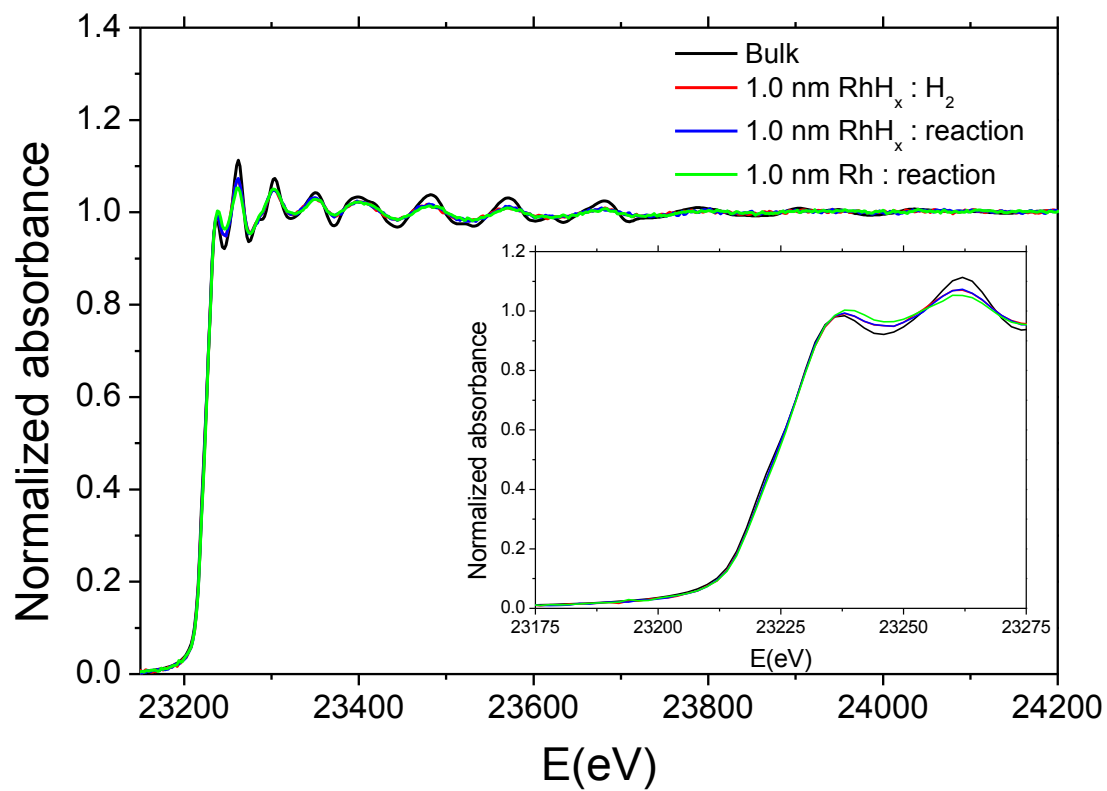

Figure S8. EXAFS spectra and corresponding FT of metal Rh nanoparticles during the hydrogenation of butadiene under 0.5% C<sub>4</sub>H<sub>6</sub> and 2.5% H<sub>2</sub> in He (36 ml min<sup>-1</sup>).

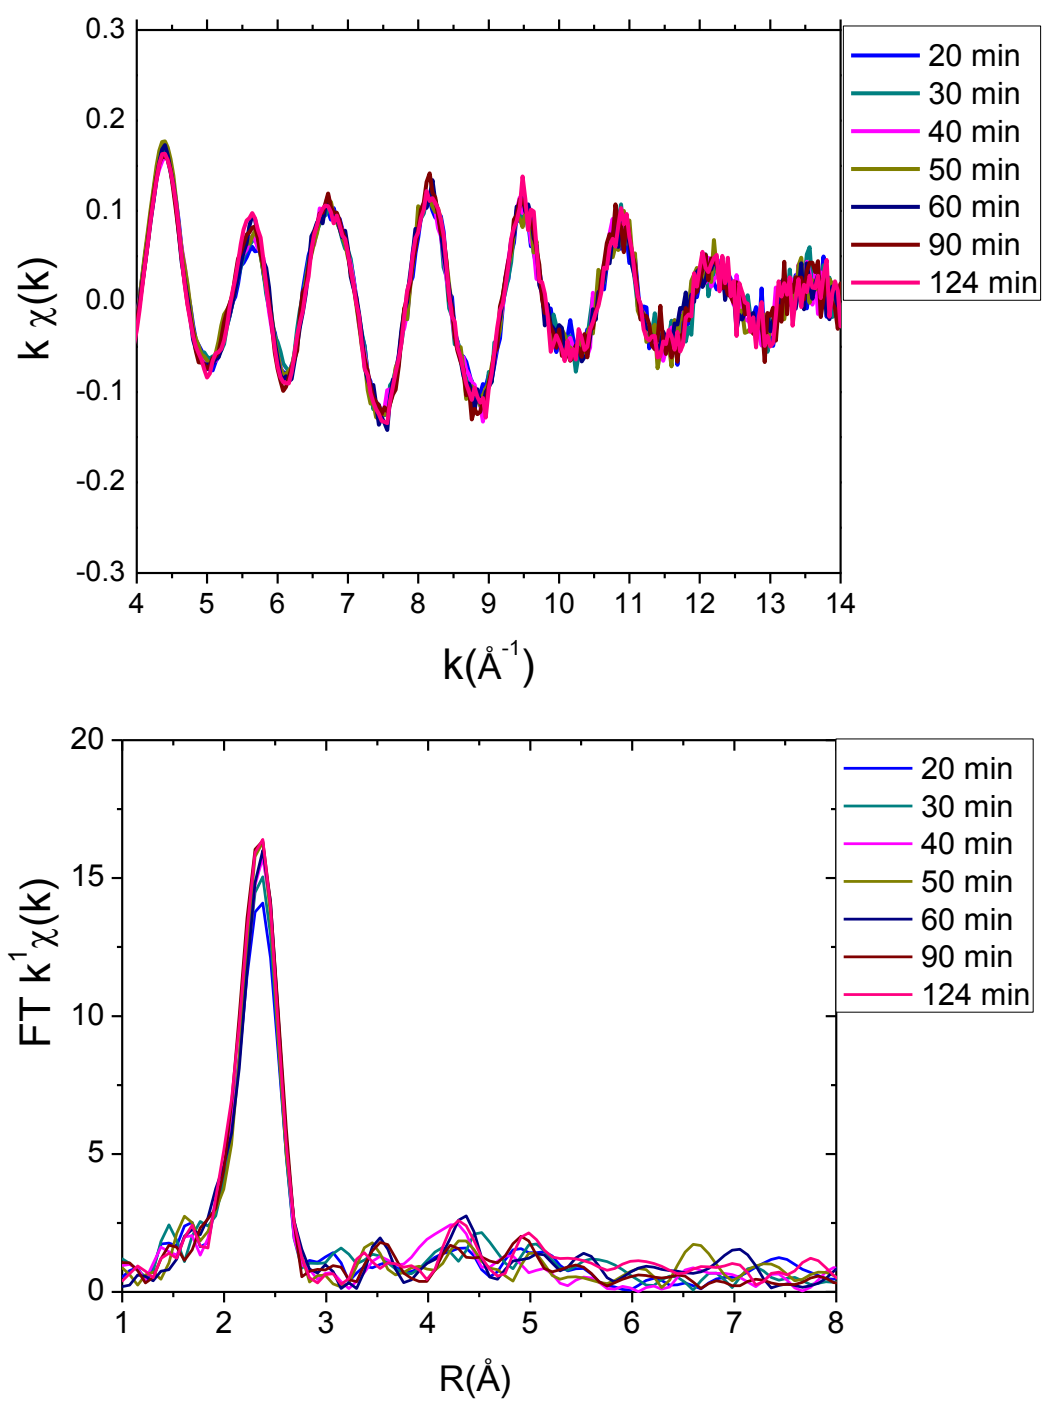

Figure S9. EXAFS spectra and corresponding FT of hydride  $\text{RhH}_x$  nanoparticles during the hydrogenation of butadiene under 0.5%  $\text{C}_4\text{H}_6$  and 2.5%  $\text{H}_2$  in He ( $36 \text{ ml min}^{-1}$ ).

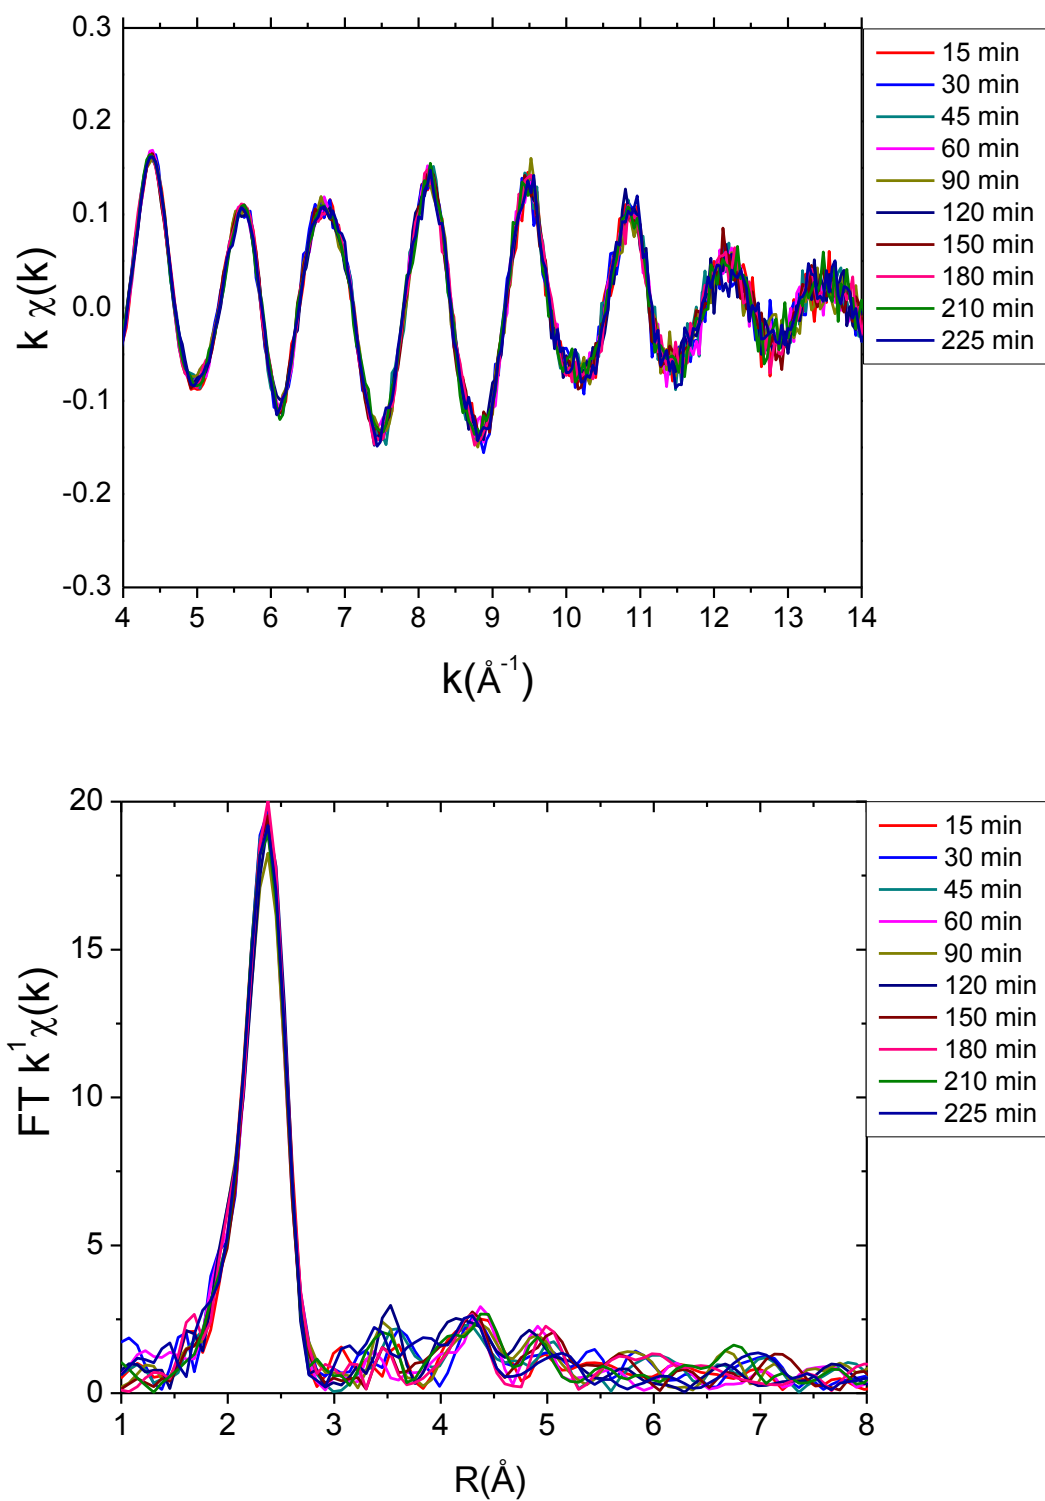

Figure S10. *Operando* EXAFS-MS experiment for hydrogenation of butadiene ( $C_4H_6:H_2 = 0.5:2.5\%$  in He, 1 bar,  $36\text{ ml min}^{-1}$ , RT) on C-supported Rh and  $RhH_x$  catalysts. Hydrocarbon contents derived from smoothed MS intensities with  $m/z = 39, 41,$  and  $43$ , accounting for (i) the relative fragment peak intensities for the pure compounds (1,3-butadiene, 1-butene and butane) and (ii) the total fragment distribution.

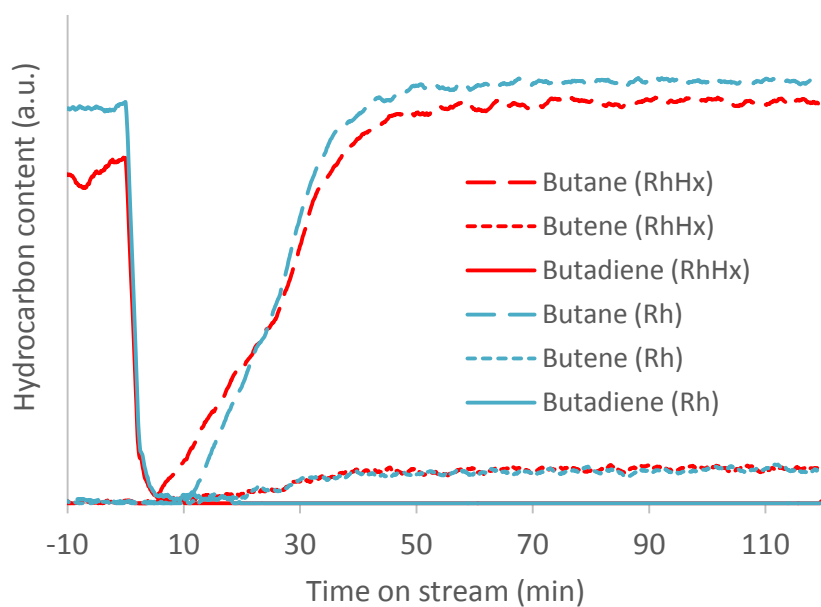

Supplement: c8cy00522b1.pdf [file c8cy00522b1.pdf]
